# Supplementary material for: The environmental impact of multi-specialty robotic-assisted surgery: a waste audit analysis
Source: Springer Nature journal article supplement (doi:10.1007/s11701-025-02278-5), 2025-03-11

**THE ENVIRONMENTAL IMPACT OF MULTI-SPECIALTY ROBOTIC-ASSISTED  
SURGERY: A WASTE AUDIT ANALYSIS**

Gerald Tjahyadi<sup>(a,b)</sup>, Patrick-Julien Treacy<sup>(a,c)</sup>, Kate Alexander<sup>(a,c,d)</sup>, Jacob Bird<sup>(a,c,d)</sup>, Sascha  
Karunaratne<sup>(a,c,d)</sup>, Scott Leslie<sup>(c,d,e)</sup>, Kate McBride<sup>(a,c)</sup>, Daniel Steffens<sup>(a,c,d)</sup>, Ruban  
Thanigasalam<sup>(c,d,f)</sup>

<sup>(a)</sup> Surgical Outcomes Research Centre (SOuRCe), Royal Prince Alfred Hospital, Sydney, NSW, Australia

<sup>(b)</sup> Faculty of Medicine and Health, Concord Clinical School, The University of Sydney, Sydney, NSW, Australia

<sup>(c)</sup> Institute of Academic Surgery (IAS), Royal Prince Alfred Hospital, Sydney, NSW, Australia

<sup>(d)</sup> Faculty of Medicine and Health, Central Clinical School, The University of Sydney, Sydney, NSW, Australia

<sup>(e)</sup> Department of Urology, Royal Prince Alfred Hospital, Sydney, NSW, Australia

<sup>(f)</sup> Department of Urology, Concord Repatriation General Hospital, Sydney, NSW, Australia

**Corresponding author:** Gerald Tjahyadi  
Surgical Outcomes Research Center (SOuRCe)  
Royal Prince Alfred Hospital  
PO Box M157 Camperdown, Sydney NSW 2050, Australia.  
E-mail: gtja2217@uni.sydney.edu.au

Online Resource 2. Diagram of item classification with a non-exhausting list of examples

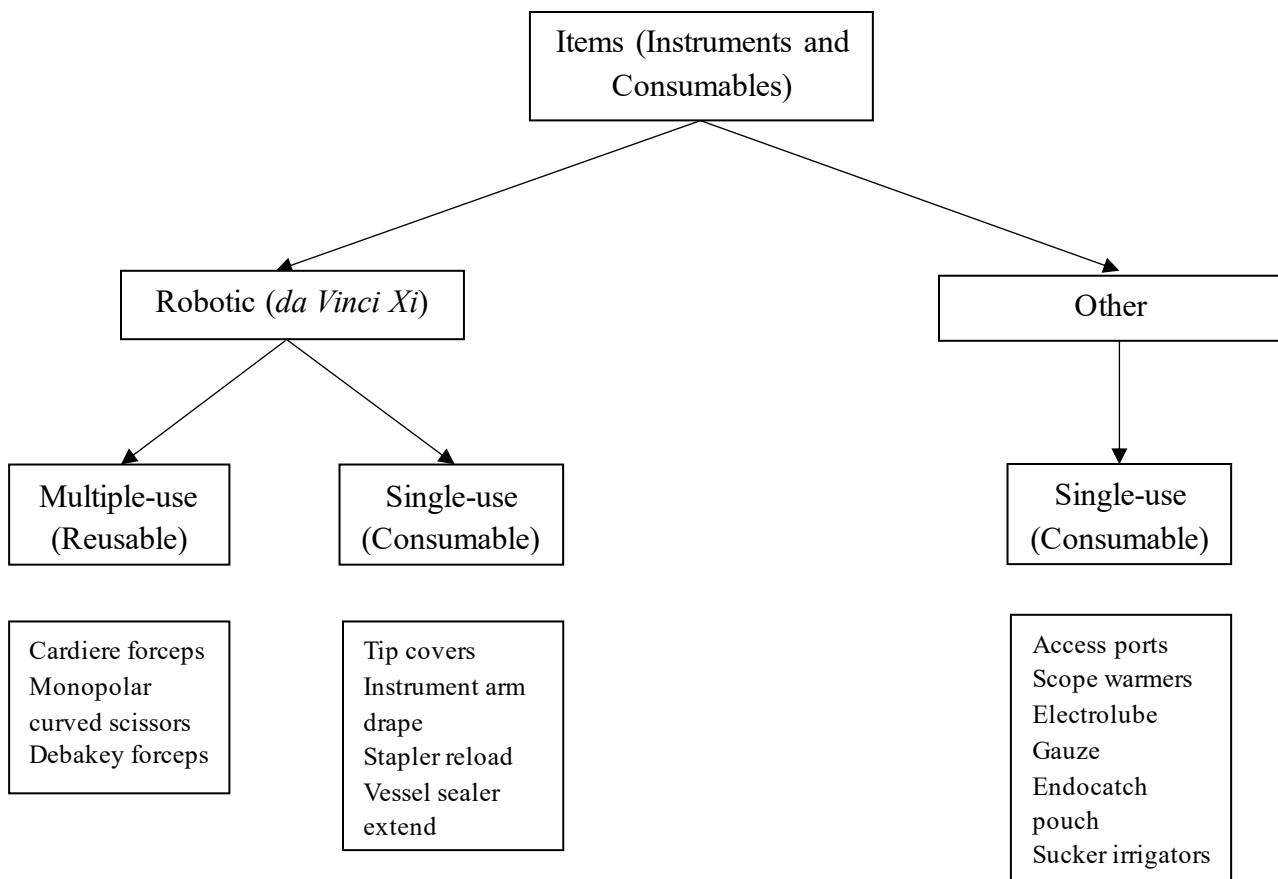

Supplement: MOESM2 [file 11701_2025_2278_MOESM2_ESM.pdf]
